# Supplementary material for: Association of Protein Tyrosine Phosphatase 1B Gene Polymorphisms With Type 2 Diabetes
Source: Oxford University Press journal article supplement (doi:10.2337/diabetes.53.11.3007), 2004-11-01
Supplement: 3007-sup-db1418_supplementarytable3a.doc [file 3007-sup-db1418_supplementarytable3a.doc]

**Supplementary Table 3A. 8-SNP haplotypes that are significantly associated in case-control either population or pooled population with p < 0.05**

| Haplotype | Disposition | H# | Freq  T2DM | Freq  controls | Freq  DHS | Freq  Controls | Freq Pool Cases | Freq Pool Controls |
| --- | --- | --- | --- | --- | --- | --- | --- | --- |
| ACTTCAG0 | Risk | H1 | **0.39**** | **0.33**** | **0.41*** | **0.34*** | **0.40**** | **0.34**** |
| GTCCTGT0 | Protective | H2 | **0.41*** | **0.45*** | **0.39**** | **0.47**** | **0.41**** | **0.46**** |
| ATCCTGGG | Neutral | H3 | **0.06*** | **0.09*** | 0.07 | 0.08 | 0.07 | 0.09 |
| ATCCTGG0 | Neutral | H4 | 0.09 | 0.07 | 0.07 | 0.04 | **0.08*** | **0.06*** |

* p < 0.05

** p < 0.01

**Supplementary Table 3B. 8-SNP haplotype odds ratios.**

| Haplotype Contrast | Disposition Contrast | OR T2DM | CI T2DM | OR DHS | CI DHS | OR Pooled | CI Pooled |
| --- | --- | --- | --- | --- | --- | --- | --- |
| H1 x H2 | Risk x Prot | 1.29 | 1.00-1.67 | 1.45 | 1.09-1.94 | 1.32 | 1.09-1.59 |
| H1 x Hn | Risk x Neutral | 1.29 | 0.95-1.76 | 1.15 | 0.80-1.65 | 1.23 | 0.98-1.56 |
| Hn x H2 | Neutral x Prot | 1.00 | 0.74-1.35 | 1.26 | 0.89-1.80 | 1.07 | 0.85-1.34 |
| H1 x  (H2 + Hn) | Risk x Others | 1.29 | 1.02-1.64 | 1.35 | 1.03-1.76 | 1.29 | 1.08-1.54 |

Supplementary Table 3C. Population Attributable Risk

| Haplotype Contrast | Disposition Contrast | PAR T2DM | PAR DHS | PAR Pooled |
| --- | --- | --- | --- | --- |
| H1 x (H2 + Hn) | Risk x Others | 16.9 % | 20.1 % | 17.2 % |
